# Supplementary material
Source: PubMed Central journal article supplement (PMC524334)

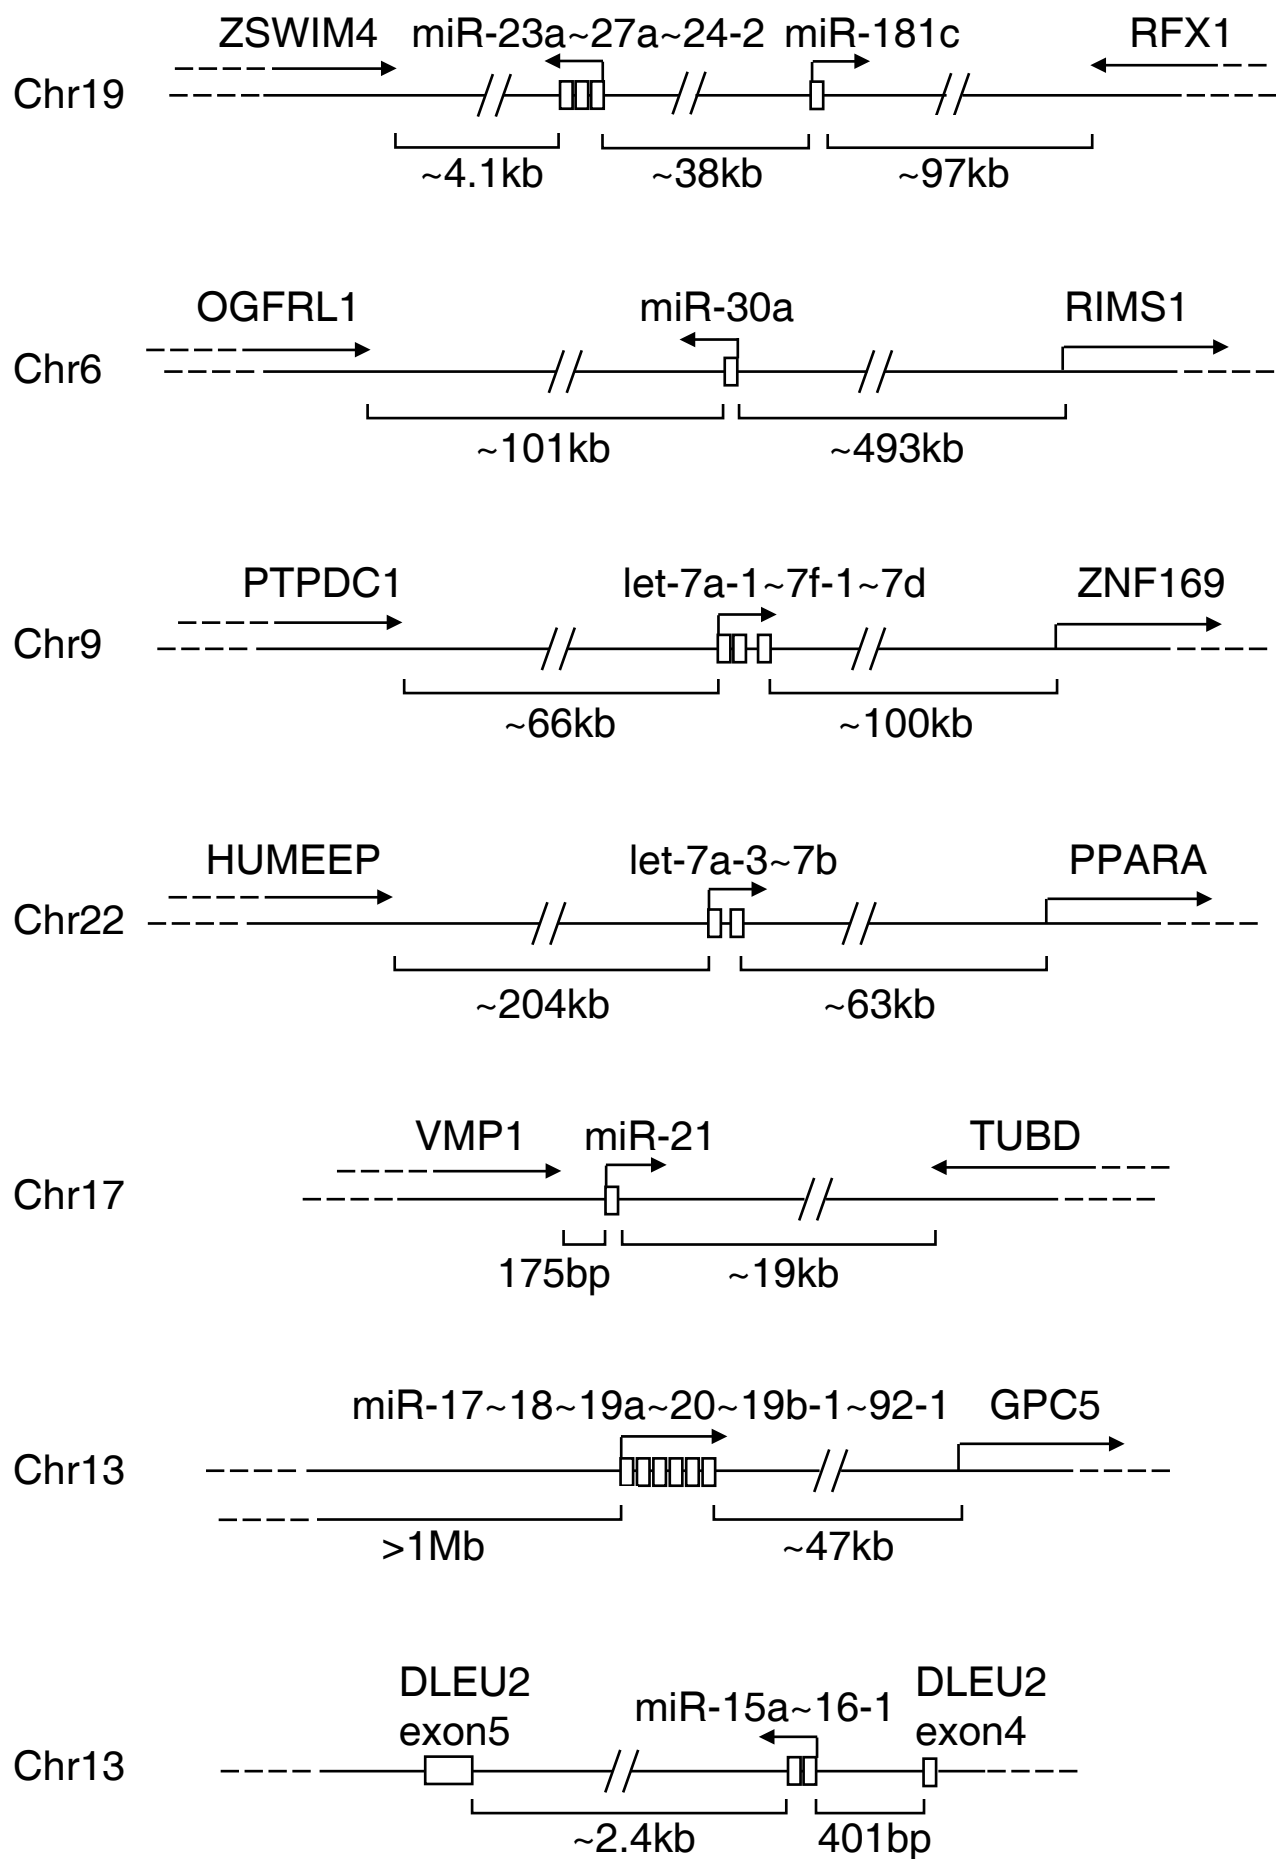

Fig.S1

Supplement: 7600385s1.pdf [file 7600385s1.pdf]
